# Supplementary material for: Thermal, pressure and light induced spin transition in the two-dimensional coordination polymer {Fe(pmd)2[Cu(CN)2]2}
Source: Royal Society of Chemistry journal article supplement (doi:10.1039/b711834a), 2007-11-16

## Supplementary Information

Calculated X-ray diffraction pattern from the crystal structure of  $\{\text{Fe}(\text{pmd})_2[\text{Cu}(\text{CN})_2]_2\}$  (red) and experimental X-ray diffraction pattern for the microcrystalline sample (blue).

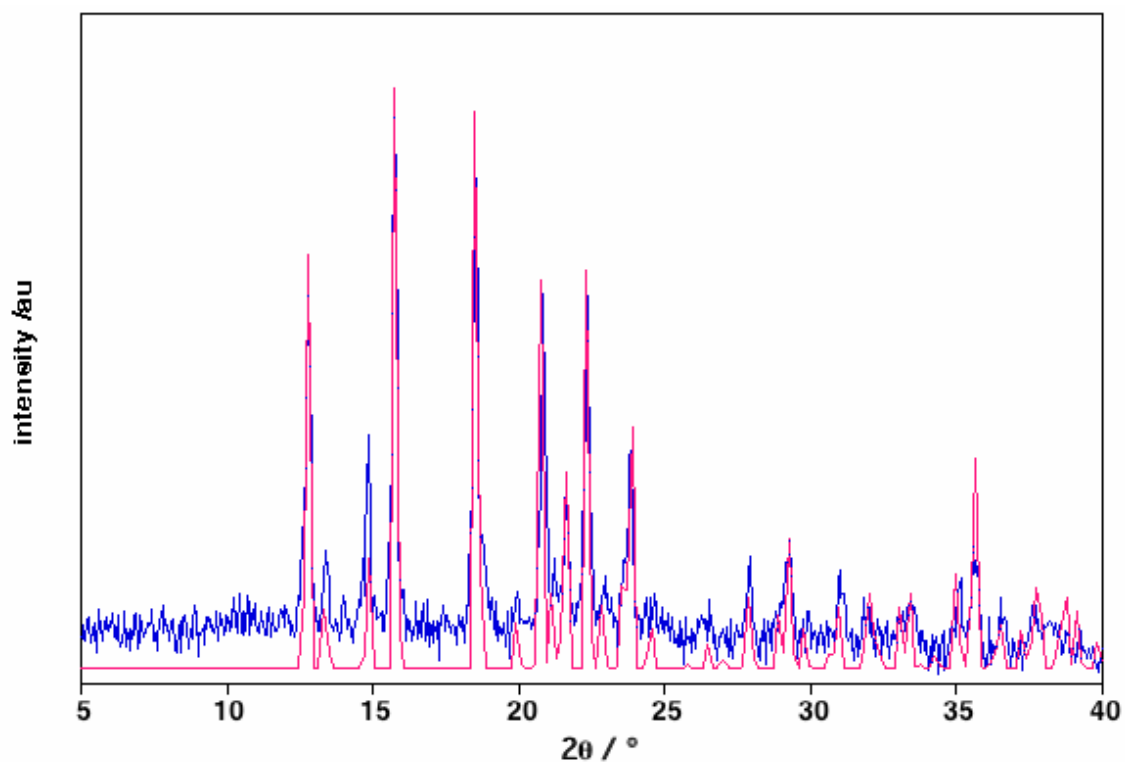

Supplement: b711834a.pdf [file b711834a.pdf]
